# Supplementary material for: Ploidy Reductions in Murine Fusion-Derived Hepatocytes
Source: PLoS Genet. 2009 Feb 20;5(2):e1000385. doi: 10.1371/journal.pgen.1000385 (PMC2636893; doi:10.1371/journal.pgen.1000385)
Supplement: Protocol S2 — Single cell PCR. (0.09 MB PDF) [file pgen.1000385.s003.pdf]

### **Protocol S2: Single cell PCR**

Single hepatocytes or splenocytes were FACS-sorted into individual wells of a 96-well PCR plate containing 5 µl lysis solution (4.7 µl 0.005% SDS, 0.2 µl 10mg/ml proteinase K, 0.1 µl 0.5M EDTA). Following incubation at 50°C for 30 min and subsequent denaturation of proteinase K at 99°C for 5 min, a semi-nested PCR was performed. Initially, multiplex PCR was carried out with primers for all loci. First round PCR was performed in a final volume of 50 µl containing 0.4 µM of each primer (external forward primers and common reverse primers), 0.2 mM dNTPS, 1 mM MgCl<sub>2</sub> and 0.75U *Taq* Polymerase in 1X reaction buffer supplied with the polymerase (New England Biolabs). The first round PCR program involved 10 cycles of 96°C for 2 min, 55°C for 1 min, 72°C for 1 min and 25 cycles of 96°C for 1 min, 55°C for 1 min, 72°C for 1 min with a final extension at 72°C for 5 min. For the second round PCR of each individual locus, 0.1µl of the first amplification was used as template in a final volume of 25 µl containing 0.2 µM of each primer (internal forward primer and common reverse primer), 0.2 mM dNTPS, 2 mM MgCl<sub>2</sub> and 0.25U *Taq* Polymerase in 1X reaction buffer supplied with the polymerase (Bioline). The second round PCR program involved 35 cycles of 95°C for 30 sec, 56°C for 30 sec, and 72°C for 60 sec with a final extension at 72°C for 5 min. PCR products were separated on a 2% agarose gel by electrophoresis and stained with ethidium bromide.

The following primer sets were used for single cell genotyping. Referenced primer sets are indicated. The AlbCre-a primer set (internal forward primer and common reverse primer) was obtained from [The Jackson Laboratories](#). All other primer sets were custom designed.

| Locus               | External Forward Primer<br>(5'→3') | Internal Forward Primer<br>(5'→3') | Common Reverse Primer<br>(5'→3') | Product Size (bp) |
|---------------------|------------------------------------|------------------------------------|----------------------------------|-------------------|
| <i>Fah-a</i>        | TGAGAGGAGGGTA<br>CTGGCAGCTAC       | CCTGTGTTAAGGGG<br>TCCTTG           | TTGCCTCTGAACAT<br>AATGCCAAC      | 174               |
| <i>Fah-b</i>        | CTAGGTCAATGGCT<br>GTTTGG [1]       | GGTGTTCCTCTGC<br>AGGA              | GGACATACCAATTT<br>GGCAAC [1]     | 115               |
| R26R <i>lacZ-a</i>  | GCACTTGCTCTCCC<br>AAAGTC           | AAAGTCGCTCTGAG<br>TTGTTAT [2]      | TCATCAAGGAAACC<br>CTGGAC         | ~275              |
| R26R <i>lacZ-b</i>  | ACTATCCCGACCGC<br>CTTACT           | GTTTTGACCGCTGG<br>GATCT            | GCGATGCAATTTCC<br>TCATTT         | ~450              |
| Cre-a               | CCGCAGAACCTGAA<br>GATGTTT          | GCGGTCTGGCAGT<br>AAAACTATC         | GTGAAACAGCATTG<br>CTGTCACTT      | 102               |
| Cre-b               | TTACGGCGCTAAGG<br>ATGACT           | TGGTCAGAGATACC<br>TGGCCT           | CTAATCGCCATCTT<br>CCAGCAGG       | 196               |
| Y-chrom<br>(TSPY)-a | GGTGATAATTCCAC<br>CCCTACTATG       | TCCTTGGGCTCTTC<br>ATTATTCTTAAC [3] | GAGAACCACGTTG<br>GTTTGAGATG [3]  | 103               |
| Y-chrom<br>(TSPY)-b | CTGCCCTTTTGTAT<br>GGGAAA           | GTGGTCCCCTTTAG<br>TACCAAC          | CACATGCAGGCAG<br>CATCTAT         | 200               |

## **REFERENCES**

1. Grompe M, al-Dhalimy M, Finegold M, Ou CN, Burlingame T, et al. (1993) Loss of fumarylacetoacetate hydrolase is responsible for the neonatal hepatic dysfunction phenotype of lethal albino mice. *Genes Dev* 7: 2298-2307.
2. Soriano P (1999) Generalized lacZ expression with the ROSA26 Cre reporter strain. *Nat Genet* 21: 70-71.
3. Wang LJ, Chen YM, George D, Smets F, Sokal EM, et al. (2002) Engraftment assessment in human and mouse liver tissue after sex-mismatched liver cell transplantation by real-time quantitative PCR for Y chromosome sequences. *Liver Transpl* 8: 822-828.
