# Supplementary material for: Ploidy Reductions in Murine Fusion-Derived Hepatocytes
Source: PLOS journal article supplement (doi:10.1371/journal.pgen.1000385), 2009-02-19
Supplement: S2 (10.1371/journal.pgen.1000385.s002) [file journal.pgen.1000385.s002]

Duncan et al.  
Ploidy Reductions in Murine Fusion-derived Hepatocytes  
PLoS Genetics, 2009

**Protocol S1: KLS cell sorting from mouse bone marrow**

KLS cells were sorted and re-analyzed based on surface marker expression of c-Kit and Sca-1 and low to negative expression of lineage markers. The combination of the following antibodies defined the lineage markers: 145-2C11 (anti-CD3e), 53-7.3 (anti-CD5), GK1.5 (anti-CD4), 53-6.7 (anti-CD8), RB6-8C5 Ly-6G (anti-Gr-1), M1/70 (anti-CD11b, Mac-1), Ter119 (anti-erythrocyte specific antigen), PK136 (anti-NK1.1) and 6B2 (anti-B220). Other antibodies used included clones 2B8 (anti-CD117, c-Kit) and D7 (anti-Ly-6A /E, Sca-1). All antibodies were purchased from Pharmingen or eBioscience. Analysis and cell sorting were carried out with an InFlux flow cytometer (Cytospeia) using a 70  $\mu$ m nozzle.
